# Supplementary material
Source: HighWire-hosted journal article supplement (https://qualitysafety.bmj.com/content/31/4/267)
Supplement: inline-supplementary-material-1 [file inline-supplementary-material-1.pdf]

**eTable 1. Analytic Cohort with Exclusion**

|                                                                                                                                                                                                                                        | Total     |        | Homeless               |        | Non-homeless           |        |
|----------------------------------------------------------------------------------------------------------------------------------------------------------------------------------------------------------------------------------------|-----------|--------|------------------------|--------|------------------------|--------|
|                                                                                                                                                                                                                                        | N         | %      | N                      | %      | N                      | %      |
| <b>Delivery hospitalizations (2009-2014)</b>                                                                                                                                                                                           | 1,402,597 |        |                        |        |                        |        |
| Records were excluded in which the zip code variable did not include either an "H", which indicates homelessness, or a numeric NY zip code, which was defined as non-homeless                                                          | 25,488    | 1.82%  | N/A                    |        | N/A                    |        |
| Discharge from the delivery hospitalization occurred in November or December                                                                                                                                                           | 259,727   | 18.52% | 20,337                 | 19.64% | 239,390                | 18.43% |
| Records of cases who died during delivery hospitalizations                                                                                                                                                                             | 65        | 0.00%  | ≤10 cases <sup>a</sup> | 0.01%  | ≥10 cases <sup>b</sup> | 0.00%  |
| Records without personal identifiers                                                                                                                                                                                                   | 747       | 0.05%  | 175                    | 0.17%  | 572                    | 0.04%  |
| Records without all of the following data at delivery hospitalization, 1] race/ethnicity, 2] insurance type during delivery, 3] age, 4] length of stay (delivery-LOS) 5] discharge month, or 6] survival status of mother for delivery | 615       | 0.04%  | 19                     | 0.02%  | 596                    | 0.05%  |
| Second delivery hospitalizations, since only the first delivery hospitalization is included                                                                                                                                            | 6,170     | 0.44%  | 119                    | 0.11%  | 6,051                  | 0.47%  |
| <b>Final analytic cohort</b>                                                                                                                                                                                                           | 1,109,785 | 79.12% | 82,820                 | 80%    | 1,026,965              | 79.05% |

<sup>a</sup> Cases ≤10 have been masked to protect patient privacy<sup>b</sup> Case number has been masked to prevent obtaining counts in neighboring cells

**eTable 2. Maternal Comorbidity Index<sup>a,b</sup>**

| Description                      | ICD-9-CM code                                                        | Weights |
|----------------------------------|----------------------------------------------------------------------|---------|
| Severe preeclampsia/eclampsia    | 642.5x, 642.6x                                                       | 5       |
| Chronic congestive heart failure | 428.22, 428.23, 428.32, 428.33, 428.42, 428.43                       | 5       |
| Congenital heart disease         | 745.0x–747.4x, 648.5x                                                | 4       |
| Pulmonary hypertension           | 416.0x, 416.8x, 416.9x                                               | 4       |
| Chronic ischemic heart disease   | 412.x–414.x                                                          | 3       |
| Sickle cell disease              | 282.4x, 282.6x                                                       | 3       |
| Multiple gestation               | V27.2–V27.8, 651.x                                                   | 2       |
| Cardiac valvular disease         | 394.x–397.x, 424.x                                                   | 2       |
| Systemic lupus erythematosus     | 710.0x                                                               | 2       |
| Human immunodeficiency virus     | 042.x, V08.x                                                         | 2       |
| Mild or unspecified preeclampsia | 642.4x, 642.7x (without severe preeclampsia/eclampsia)               | 2       |
| Drug abuse                       | 304.x, 305.2x–305.9x, 648.3x                                         | 2       |
| Placenta previa                  | 641.0x, 641.1x                                                       | 2       |
| Chronic renal disease            | 581.x–583.x, 585.x, 587.x, 588.x, 646.2x                             | 1       |
| Pre-existing hypertension        | 401.x–405.x, 642.0x–642.2x, 642.7x                                   | 1       |
| Previous cesarean delivery       | 654.2x                                                               | 1       |
| Gestational hypertension         | 642.3x (without preeclampsia/eclampsia or pre-existing hypertension) | 1       |
| Alcohol abuse                    | 291.xx, 303.xx, 305.0x                                               | 1       |
| Asthma                           | 493.x                                                                | 1       |
| Pre-existing diabetes mellitus   | 250.x, 648.0x                                                        | 1       |
| Maternal age, years              |                                                                      |         |
| >44                              |                                                                      | 3       |
| 40–44                            |                                                                      | 2       |
| 35–39                            |                                                                      | 1       |

<sup>a</sup> Bateman BT, Mhyre JM, Hernandez-Diaz S, et al. Development of a comorbidity index for use in obstetric patients. *Obstet Gynecol.* 2013;122(5):957-965

<sup>b</sup> Maternal comorbidity index score was calculated by applying weights to each identified condition and summing the weighted values for each individual, resulting in one maternal comorbidity index score used as an adjustment variable in the regression models

**eTable 3. Adjustment Variables**

|                               |                                                                                                                                                                                                                                                                                                  |
|-------------------------------|--------------------------------------------------------------------------------------------------------------------------------------------------------------------------------------------------------------------------------------------------------------------------------------------------|
| Age                           | Categorized into quintiles (<23 years, 23–27 years, 28–30 years, 31–34 years, and ≥35 years)                                                                                                                                                                                                     |
| Race/Ethnicity                | Race/ethnicity was categorized as non-Hispanic white, non-Hispanic Black or African American, Hispanic, and other                                                                                                                                                                                |
| Insurance type                | Insurance type was for the delivery hospitalization, and was categorized as <i>public</i> , <i>private</i> , <i>self-pay</i> , and <i>other form of insurance</i> . The category <i>self-pay</i> is understood to include those without insurance and is used as a proxy for uninsured patients. |
| Delivery length of stay (LOS) | Categorized into quintiles (≤1 day, 2 days, 3 days, 4 days, and ≥5 days)                                                                                                                                                                                                                         |
| Maternal comorbidities        | Maternal Comorbidity Index created from the comorbidity listed in eTable 2                                                                                                                                                                                                                       |
| Other pregnancy complications | Hemorrhage; premature rupture of membranes; preterm labor; postpartum infection; uterine rupture; thrombotic event early onset of delivery                                                                                                                                                       |
| Neonatal complications        | Fetal distress; fetal growth restriction; stillbirth                                                                                                                                                                                                                                             |
| Cesarean delivery             | Binary variable to indicate patient delivered via cesarean procedure                                                                                                                                                                                                                             |
| Year                          | Categorized into quintiles (2009, 2010, 2011, 2012, 2013, or 2014)                                                                                                                                                                                                                               |
| Birth hospital ID             | Included as a random effect                                                                                                                                                                                                                                                                      |

**eTable 4. Multicollinearity Index**

|                                                          | 1    | 2    | 3     | 4    | 5     | 6    | 7    | 8    | 9     |
|----------------------------------------------------------|------|------|-------|------|-------|------|------|------|-------|
| Cesarean Delivery                                        | 1.00 | 0.34 | -0.01 | 0.10 | -0.02 | 0.07 | 0.07 | 0.07 | -0.02 |
| Maternal Comorbidity                                     |      | 1.00 | 0.02  | 0.07 | -0.02 | 0.19 | 0.19 | 0.02 | 0.01  |
| Neonatal Complication                                    |      |      | 1.00  | 0.03 | 0.00  | 0.04 | 0.04 | 0.01 | 0.00  |
| Hemorrhage                                               |      |      |       | 1.00 | 0.00  | 0.07 | 0.07 | 0.04 | 0.01  |
| Premature Rupture of Membranes                           |      |      |       |      | 1.00  | 0.13 | 0.13 | 0.00 | 0.00  |
| Preterm Labor                                            |      |      |       |      |       | 1.00 | 1.00 | 0.02 | 0.00  |
| Early Onset of Delivery                                  |      |      |       |      |       |      | 1.00 | 0.02 | 0.00  |
| Postpartum Infection                                     |      |      |       |      |       |      |      | 1.00 | 0.01  |
| Other Complication (Uterine Rupture or Thrombotic Event) |      |      |       |      |       |      |      |      | 1.00  |

**eTable 5. Results from the Likelihood Ratio Test to Examine the Association between Homelessness and Differences in Outcomes**

| Outcome           | LR statistic <sup>a</sup> | DF <sup>b</sup> | p-value |
|-------------------|---------------------------|-----------------|---------|
| Rehospitalization | 4                         | 1               | .04     |
| ED revisit        | 21                        | 1               | <0.01   |

<sup>a</sup> Likelihood ratio statistic<sup>b</sup> Degree of freedom

**eFigure 1. Days Between Discharge from Delivery Hospitalization and Readmission among Homeless****eFigure 2. Days Between Discharge from Delivery Hospitalization and Readmission among Non-homeless****eFigure 3. Days Between Discharge from Delivery Hospitalization and ED Visit among Homeless****eFigure 4. Days Between Discharge from Delivery Hospitalization and ED Visit among Non-homeless****eFigure 5. Risk-Adjusted Rate<sup>a</sup> of Six-Week Postpartum Readmissions by Income**

<sup>a</sup> Rates were adjusted by age, race/ethnicity, insurance type during delivery, delivery length of stay, maternal comorbidity index score, other pregnancy complications, neonatal complications, delivery characteristics, i.e., cesarean delivery, year fixed effects, and a birth hospital random effect

<sup>b</sup> Quartiles range from the lowest median household income zip code area (Quartile 1) to the highest median household income zip code area (Quartile 4)

Caption:

**Homeless:** Point Estimate: 1.4% (95%CI: 1.3%–1.7%)

**Income Quartile 1 (Lowest):** Point Estimate: 1.7% (95%CI: 1.6%–1.8%)

**Income Quartile 2:** Point Estimate: 1.6% (95%CI: 1.5%–1.7%)

**Income Quartile 3:** Point Estimate: 1.7% (95%CI: 1.6%–1.8%)

**Income Quartile 4 (Highest):** Point Estimate: 1.5% (95%CI: 1.4%–1.6%)

**eFigure 6. Risk-Adjusted Rate<sup>a</sup> of Six-Week Postpartum ED Visits by Income**

<sup>a</sup> Rates were adjusted by age, race/ethnicity, insurance type during delivery, delivery length of stay, maternal comorbidity index score, other pregnancy complications, neonatal complications, delivery characteristics, i.e., cesarean delivery, year fixed effects, and a birth hospital random effect

<sup>b</sup> Quartiles range from the lowest median household income zip code area (Quartile 1) to the highest median household income zip code area (Quartile 4)

Caption:

**Homeless:** Point Estimate: 8.4% (95%CI: 7.7%–9.1%)

**Income Quartile 1 (Lowest):** Point Estimate: 10.3% (95%CI: 9.8%–10.9%)

**Income Quartile 2:** Point Estimate: 9.8% (95%CI: 9.2%–10.4%)

**Income Quartile 3:** Point Estimate: 9.2% (95%CI: 8.7%–9.8%)

**Income Quartile 4 (Highest):** Point Estimate: 8.6% (95%CI: 8.1%–9.1%)
