# Supplementary material
Source: HighWire-hosted journal article supplement (https://qualitysafety.bmj.com/content/31/4/267)

## eFigure 1. Days Between Discharge from Delivery Hospitalization and Readmission among Homeless

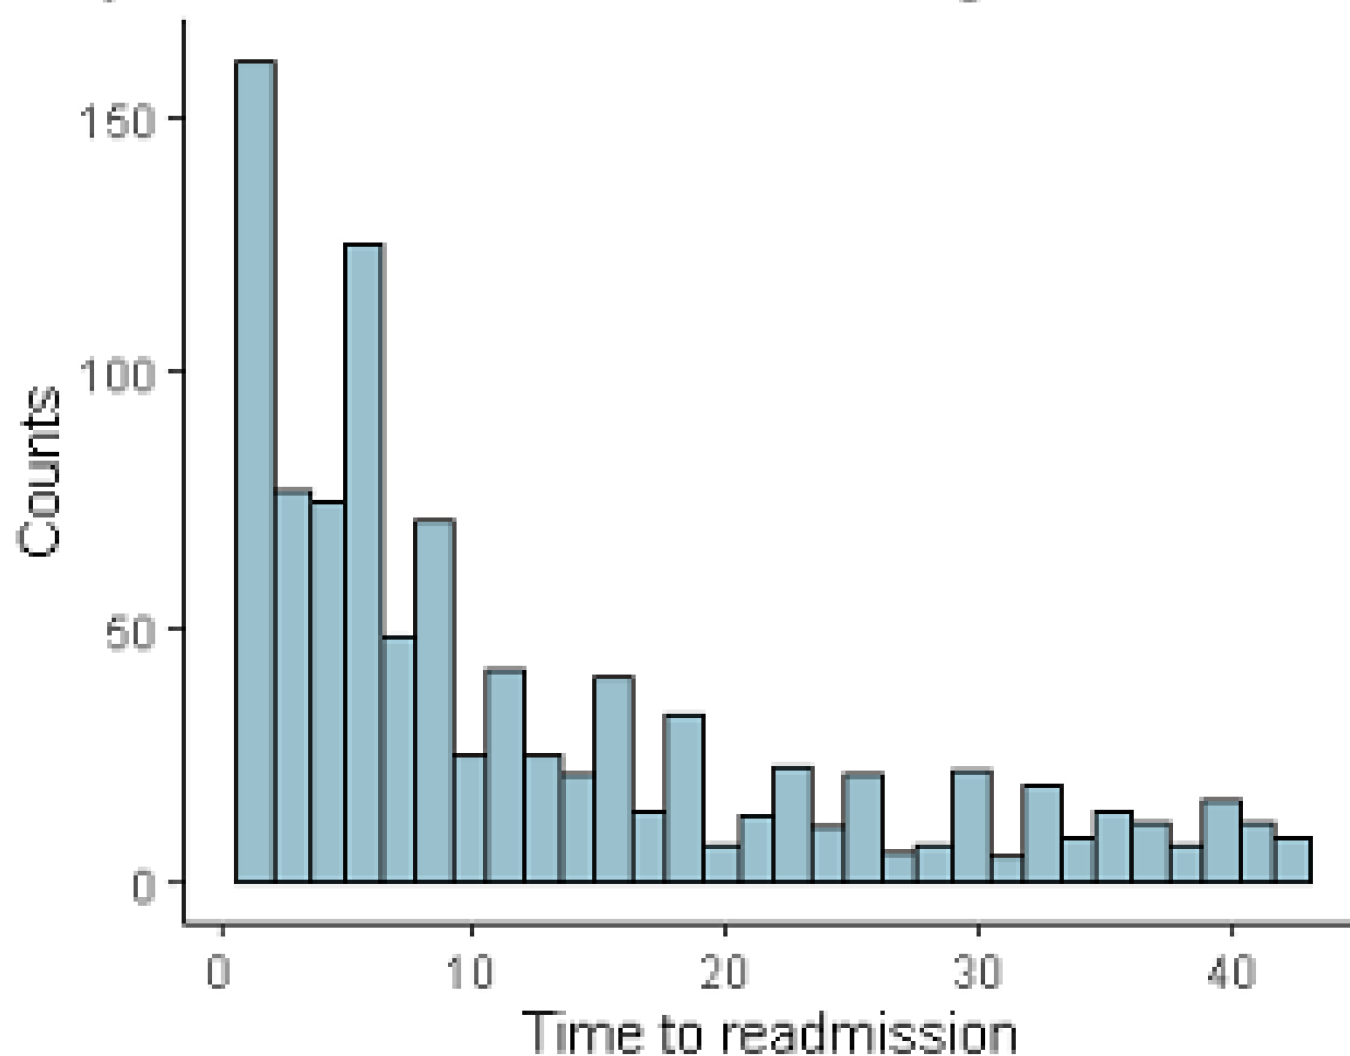

Supplement: inline-supplementary-material-2 [file inline-supplementary-material-2.pdf]
