# Supplementary material
Source: HighWire-hosted journal article supplement (https://qualitysafety.bmj.com/content/31/4/267)

## eFigure 4. Days Between Discharge from Delivery Hospitalization and ED Visit among Non-homeless

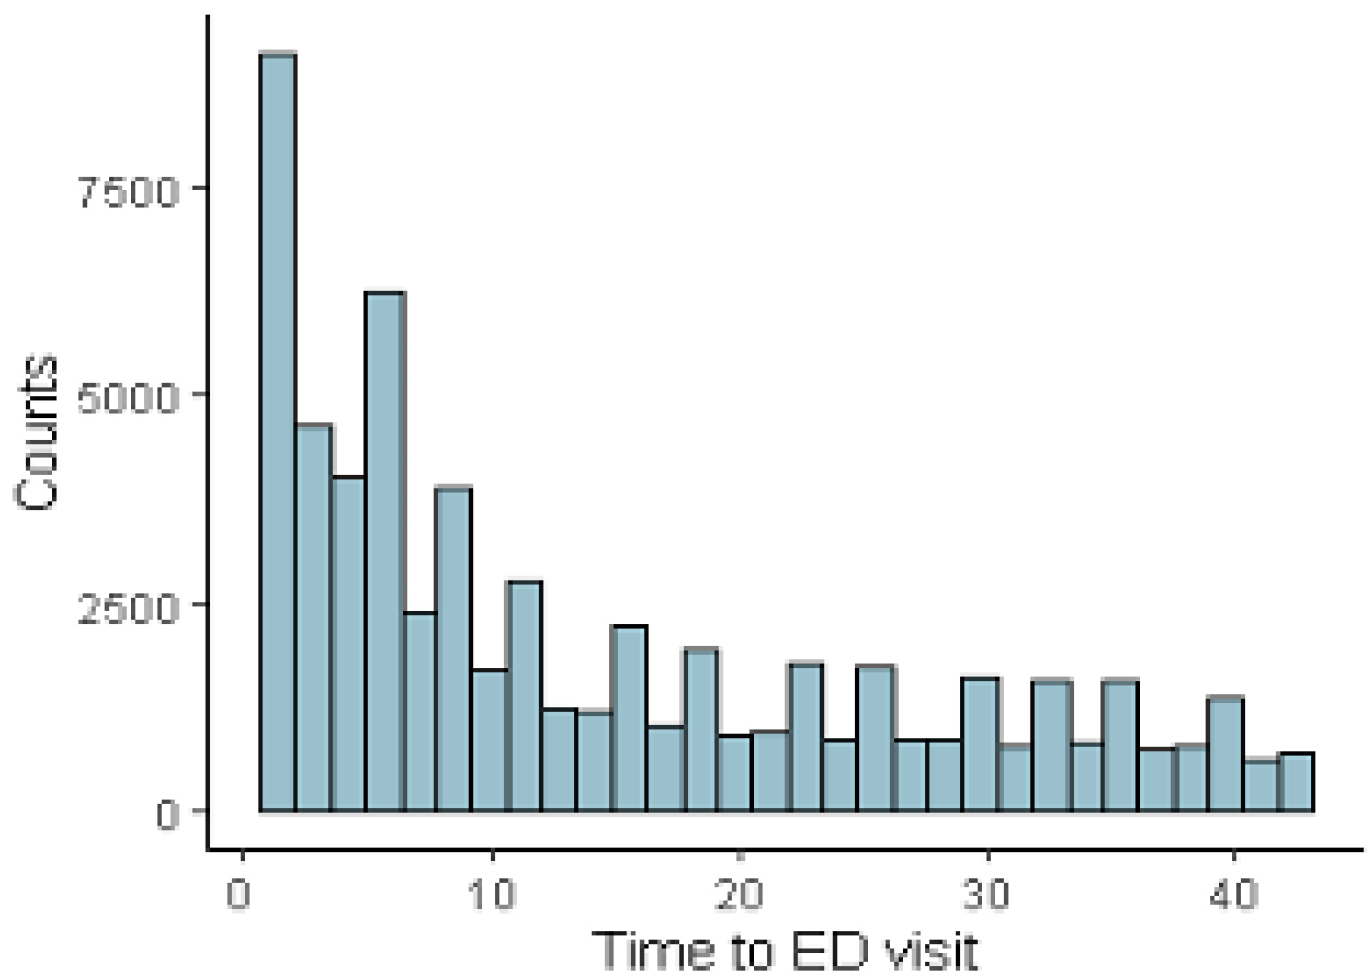

Supplement: inline-supplementary-material-5 [file inline-supplementary-material-5.pdf]
