# Supplementary material
Source: HighWire-hosted journal article supplement (https://qualitysafety.bmj.com/content/31/4/267)

### eFigure 3. Days Between Discharge from Delivery Hospitalization and ED Visit among Homeless

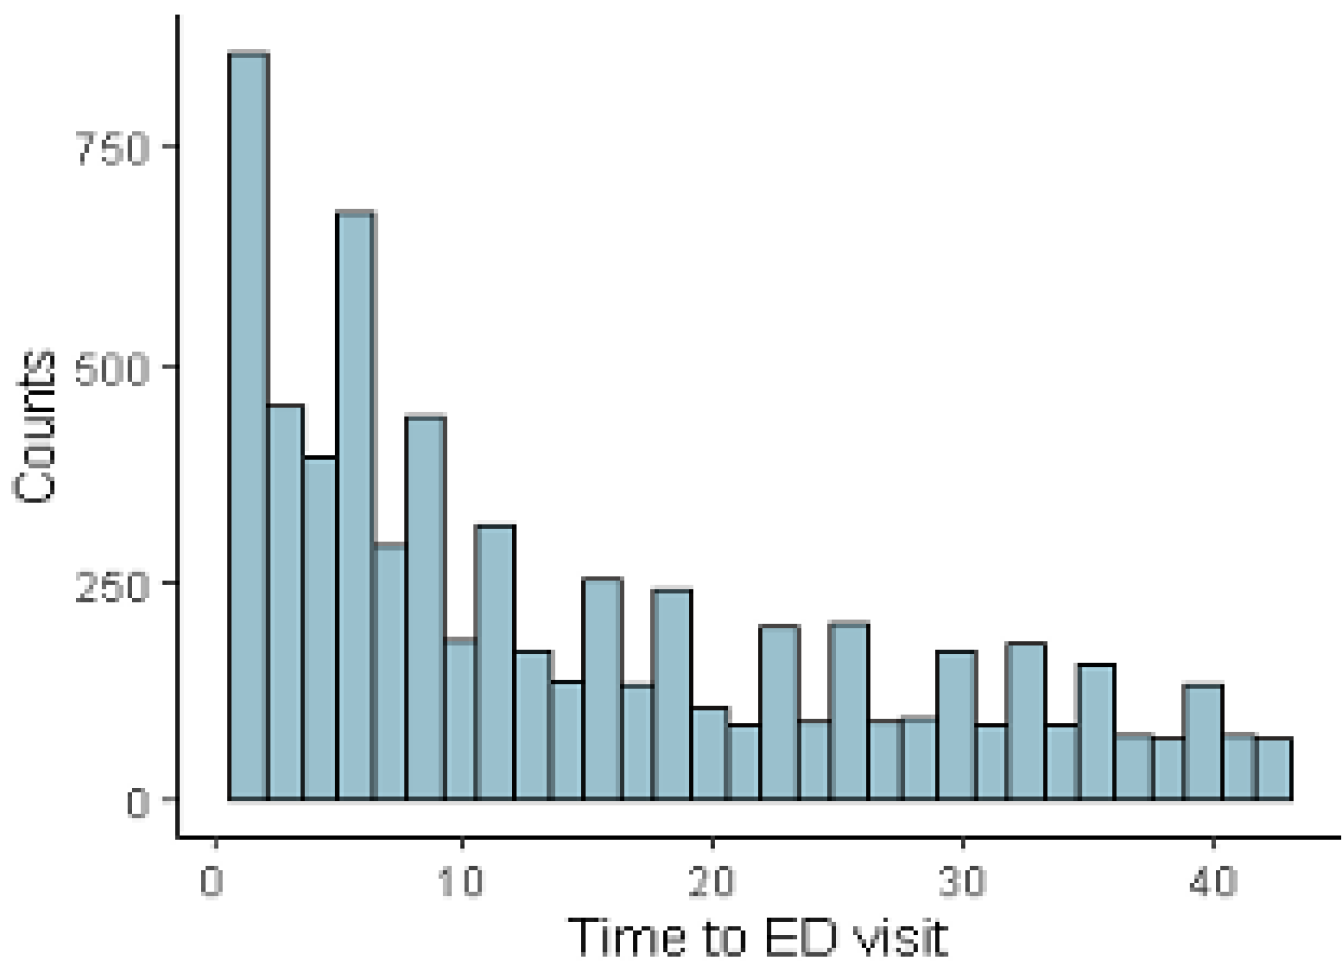

Supplement: inline-supplementary-material-4 [file inline-supplementary-material-4.pdf]

## eFigure 5. Risk-Adjusted Rate<sup>a</sup> of Six-Week Postpartum Readmissions by Income

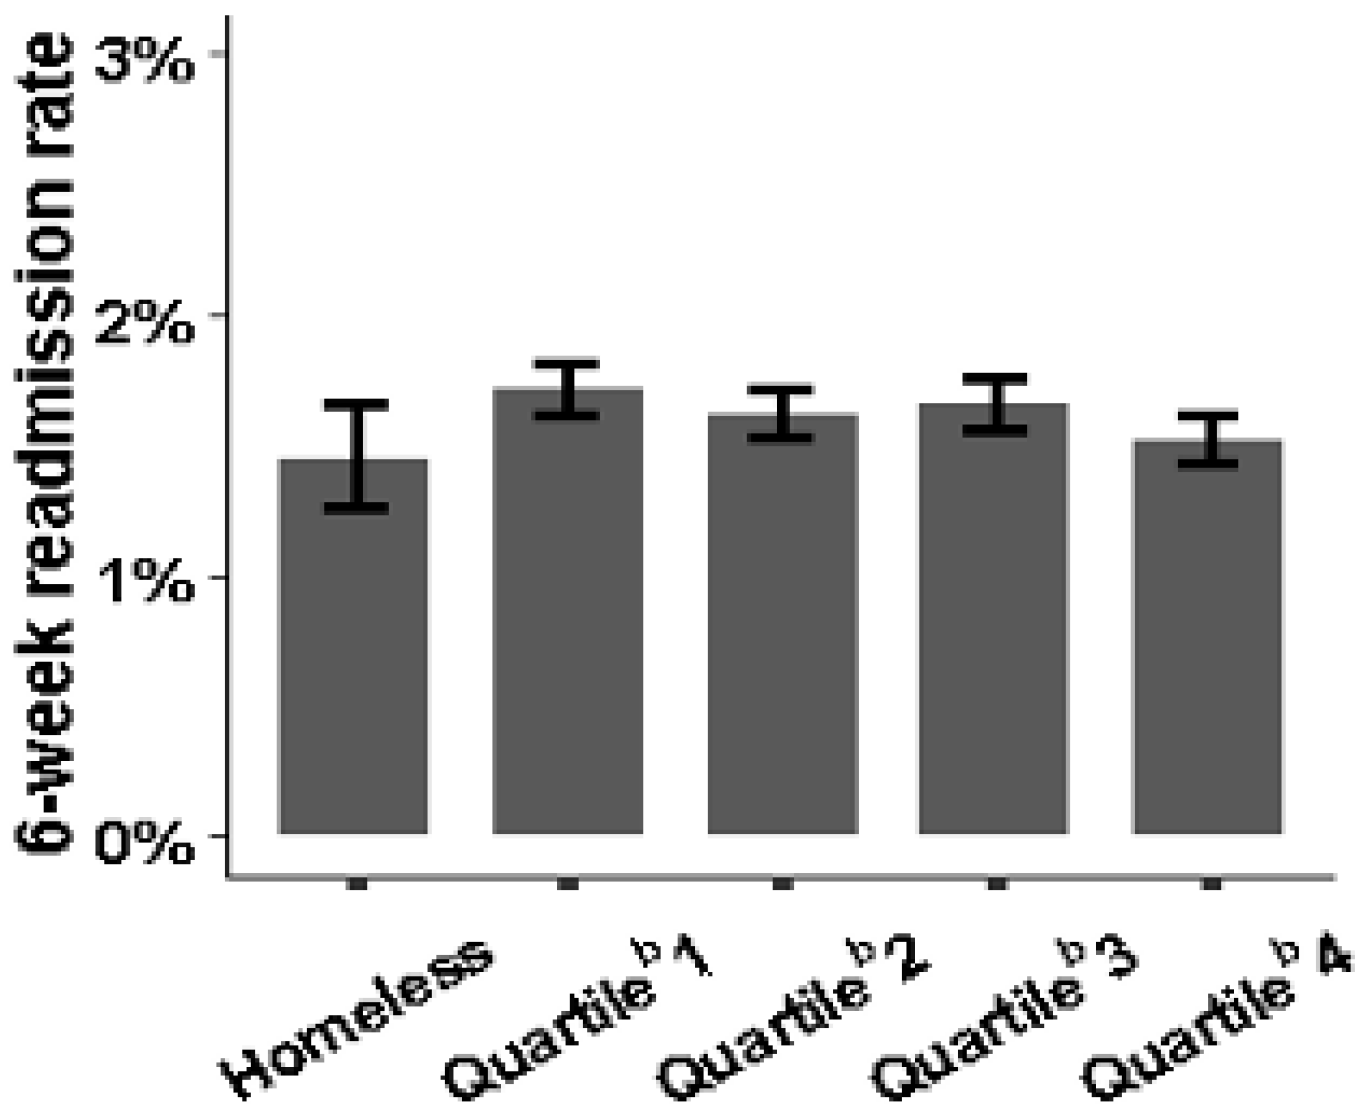

Supplement: inline-supplementary-material-6 [file inline-supplementary-material-6.pdf]

## eFigure 6. Risk-Adjusted Rate<sup>a</sup> of Six-Week Postpartum ED Visits by Income

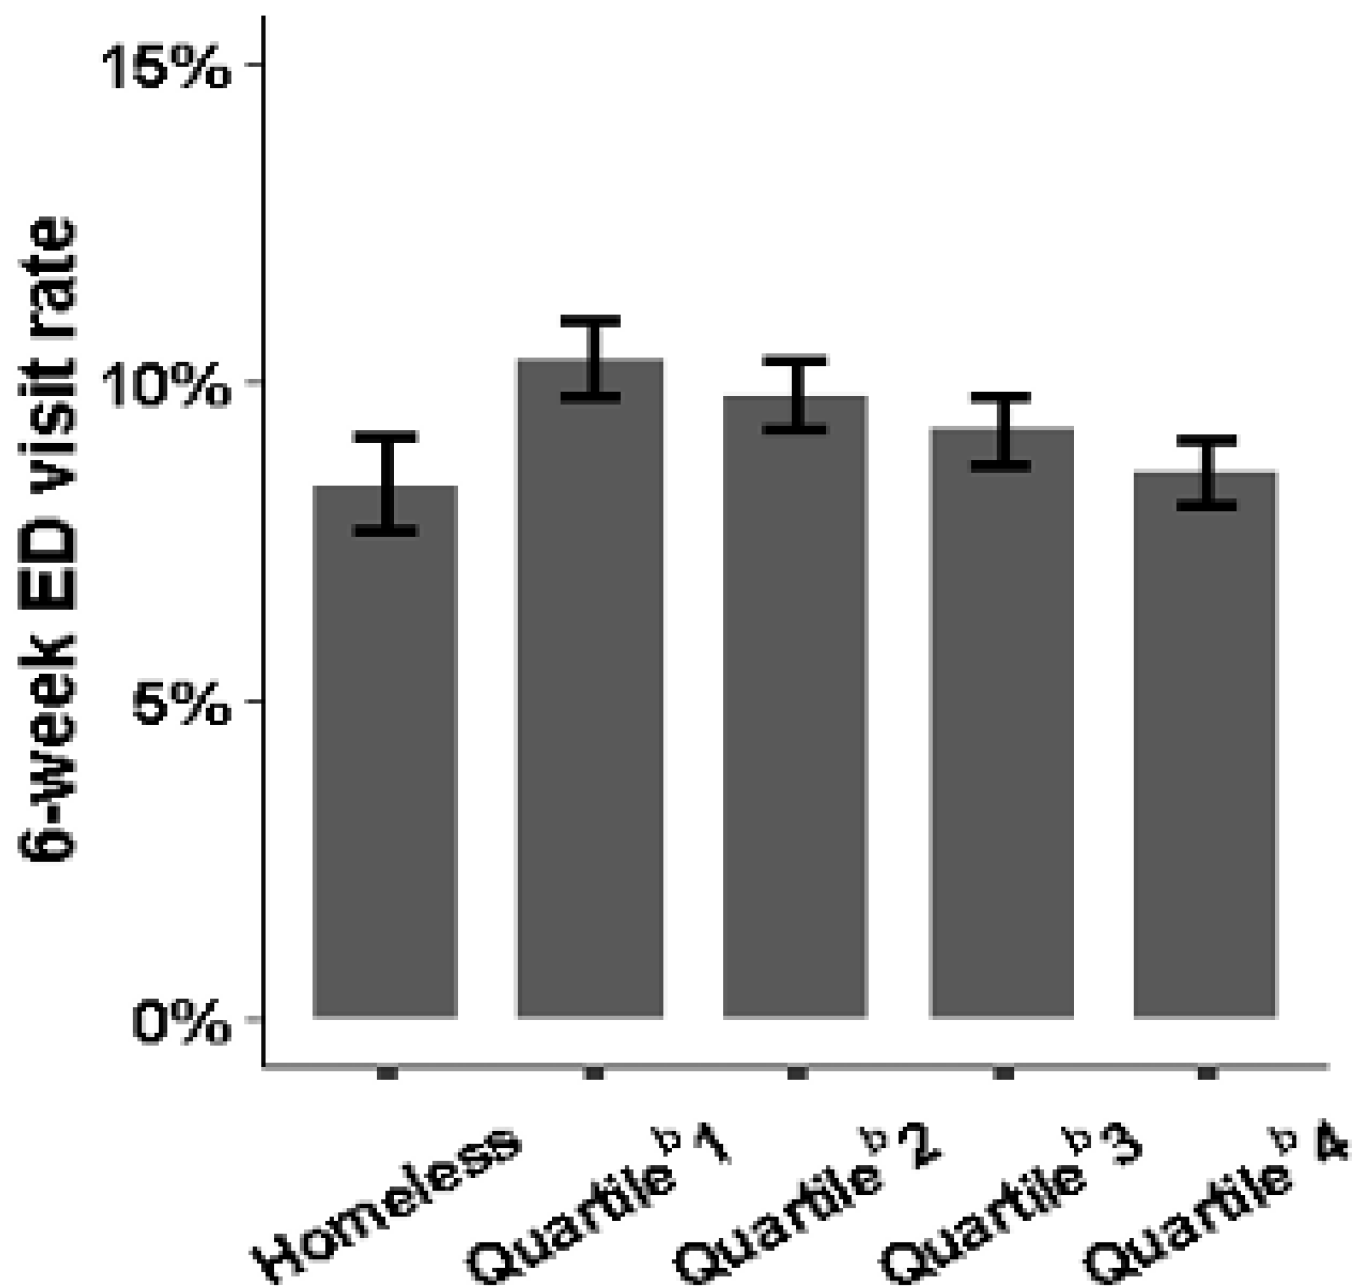

Supplement: inline-supplementary-material-7 [file inline-supplementary-material-7.pdf]
